# Supplementary material for: Association Between Skeletal Muscle Mass and Fatty Liver Index; Insights From NHANES (2017–2020)
Source: Research Square preprint supplement (doi:10.21203/rs.3.rs-6260691/v1), 2025-05-20
Supplement: Supplementary file 1 [file 268bce009a63ebb7a2095c0c.docx]

Supplementary Table 1.Trend Analysis

| Variables | Model1 | |  | Model2 | |  | Model3 | |  | Model4 | |
| --- | --- | --- | --- | --- | --- | --- | --- | --- | --- | --- | --- |
| OR (95%CI) | *P* | OR (95%CI) | *P* | OR (95%CI) | *P* | OR (95%CI) | *P* |
| Trend | 1.83 (1.35 ~ 2.48) | <.001 |  | 1.36 (0.94 ~ 1.96) | 0.098 |  | 1.34 (0.92 ~ 1.94) | 0.127 |  | 1.31 (0.91 ~ 1.91) | 0.151 |
| OR: Odds Ratio,CI: Confidence Interval | | | | | | | | | | | |
| Model1: Crude | | | | | | | | | | | |
| Model2: Adjust: Sex, Age, Race/ethnicity, Education, Family income to poverty ratio, BMI | | | | | | | | | | | |
| Model3: Adjust: Sex, Age, Race/ethnicity, Education, Family income to poverty ratio, BMI, Drinking status, Smoking status, Hypertension, Diabetes | | | | | | | | | | | |
| Model4: Adjust: Sex, Age, Race/ethnicity, Education, Family income to poverty ratio, BMI, Drinking status, Smoking status, Hypertension, Diabetes, TyG | | | | | | | | | | | |
